# Supplementary material
Source: PubMed Central journal article supplement (PMC5744723)
Supplement: EHP353.s001.acco.pdf [file EHP353.s001.acco.pdf]

**Note to readers with disabilities:** *EHP* strives to ensure that all journal content is accessible to all readers. However, some figures and Supplemental Material published in *EHP* articles may not conform to [508 standards](#) due to the complexity of the information being presented. If you need assistance accessing journal content, please contact [ehponline@niehs.nih.gov](mailto:ehponline@niehs.nih.gov). Our staff will work with you to assess and meet your accessibility needs within 3 working days.

## **Supplemental Material**

### **Levels and Determinants of DDT and DDE Exposure in the VHEMBE Cohort**

Fraser W. Gaspar, Jonathan Chevrier, Lesliam Quirós-Alcalá, Jonah M. Lipsitt, Dana Barr, Nina Holland, Riana Bornman, and Brenda Eskenazi

#### **Table of Contents**

1. Quantification of *o,p'* and *p,p'*-DDT and DDE Isomers
2. Quality Control Results for VHEMBE Serum Analysis
3. Additional Results

**Table S1.** Propensity score distributions for estimating  $E(A|W)$  for assessing positivity violations.

**Table S2.** Algorithm weights used by SuperLearner to estimate  $E(Y|A, W)$

**Table S3.** Algorithm weights used by SuperLearner to estimate  $E(A|W)$ .

**Table S4.** *p,p'*-DDT and *p,p'*-DDE concentrations (ng/g-lipid) by selected characteristics in VHEMBE participants, Limpopo, South Africa.

**Table S5.** Comparison of VHEMBE lipid-adjusted serum concentrations with previously reported blood concentrations in adults living in IRS communities and pregnant women living in the United States

**Figure S1.** Directed Acyclical Graph (DAG) used to conceptualize the relationship between exposures and outcomes.

**Figure S2.** Spatial distribution of *p,p'*-DDE concentrations in relation to Tshilidzini Hospital

References

## 1. Quantification of *o,p'* and *p,p'*-DDT and DDE Isomers

To quantify *o,p'* and *p,p'* isomers of DDT and DDE, 1 mL aliquots of serum were spiked with isotopically labeled internal standards and vortex mixed to homogenize. Five percent Na<sub>2</sub>SO<sub>4</sub> (in water): propanol (85:15 v/v) solution was added to denature serum proteins. Denatured serum samples were extracted using C18 solid phase extraction (SPE) cartridges with a water/propanol wash and elution with hexane/ethyl acetate (1:1 v/v). The eluates were dried over anhydrous Na<sub>2</sub>SO<sub>4</sub> and concentrated to 2 mL. Concentrates were passed through a Florisil® SPE cartridge to remove residual biogenic material. SPE cartridges were eluted with hexane:ethyl acetate (1:1 v/v) and concentrated to dryness. Residues were reconstituted in 100 µL isooctane and placed in GC vials for analysis. 2 µL of the reconstituted residues were injected into a gas chromatography and separated using a DB-5MS (5%-Phenyl)-methylpolysiloxane, 0.25 µ film thickness, 0.25 mm ID x 30 m) capillary column. The target analytes were analyzed using tandem mass spectrometry. Two precursor-product ion transitions (one for quantification, one for confirmation) were monitored for each target analyte and one for each internal standard. In order to be positively identified as the target analyte, the following criteria had to be met: (1) both quantification and confirmation ions must be present; (2) the ratio of the quantification to confirmation ion areas had to be within ± 20% of the theoretical Cl isotope ratio; (3) co-elution of native analyte with its respective <sup>13</sup>C-labelled internal standard or elution 4-6 seconds after its respective <sup>2</sup>H-labeled internal standard. The concentration of each analyte was calculated from its individual matrix-matched linear isotope dilution calibration.

## 2. Quality Control Results for VHEMBE Serum Analysis

Laboratory quality control procedures included matrix-matched calibrants and serum and reagent blanks prepared and analyzed concurrently with unknown samples in each analytic run. Across the 9 calibration standards (n = 64), the average recovery ranged from 97 to 103% for all DDT/E isomers and the coefficient of variation of the standard measurements ranged from 7.7% to 13.7% for all DDT/E isomers. The average (SD) laboratory blank concentration (n = 18) was 0.01 (0.02) ng/mL for *p,p'*-DDT, 0.01 (0.02) ng/mL for *o,p'*-DDT, 0.20 (0.18) ng/mL for *p,p'*-DDE, and 0.02 (0.02) ng/mL for *o,p'*-DDE. In addition to laboratory-prepared quality control samples, three field blanks, sealed blanks, and spiked samples were prepared by the field staff in South Africa to test for contamination and accuracy of DDT/E serum concentration measurements. Pesticide-grade isopropanol (Fisher Chemical Optima™ LC/MS) was used as the field and sealed blanks and National Institute of Standards and Technology's Standard Reference Material 1958 (Organic Contaminants in Fortified Human Serum) was used as the blood spikes. For field blanks, all steps of the blood collection procedure were mimicked (pulled into vacutainer, spun in centrifuge, aliquoted into cryovials, etc.) to determine if any contamination occurred during either the blood collection or analysis. Sealed blanks were directly aliquoted into cryovials to determine if any contamination occurred during the analysis. All field and sealed blanks (n = 6) were below the LOD, indicating little contamination during sample collection, processing, and analysis (results not shown).

Field spikes indicated that our *p,p'*-DDE concentrations were approximately three times lower than expected. New *p,p'*-DDE standards were quantified, which confirmed that our previously used standards were scaled incorrectly. The ratio of the average percent recovery across nine

standards for *p,p'*-DDE concentrations from the new and old standards was used to scale our *p,p'*-DDE measurements (scaling factor = 3.30). To further test our scaling approach, we compared 11 *p,p'* and *o,p'*-DDE concentrations using our old calibration curve after applying the scaling factor to those quantified using the new calibration curve and found strong agreement between these replicate measurements. For example, the average relative percent difference (RPD) between the measurements was 4.7% for *p,p'*-DDE (RPD range: 0.8-11.1%) and 5.4% for *o,p'*-DDE (RPD range: 0.6-10.9%).

### 3. Additional Results

Table S1. Propensity score distributions for estimating  $E(A|W)$  for assessing positivity violations.

| Intervention                                         | Minimum | 25th %ile | Median | Mean | 75th %ile | Maximum |
|------------------------------------------------------|---------|-----------|--------|------|-----------|---------|
| Water piped into home                                | 0.07    | 0.33      | 0.64   | 0.55 | 0.77      | 0.94    |
| Wet mopping home $\geq 7$ times per week             | 0.32    | 0.46      | 0.53   | 0.52 | 0.6       | 0.63    |
| Washing bed sheets $\geq 2$ times per month          | 0.48    | 0.56      | 0.57   | 0.57 | 0.59      | 0.64    |
| Not eating a high fat diet                           | 0.56    | 0.73      | 0.75   | 0.75 | 0.77      | 0.84    |
| Not consuming local animal products during pregnancy | 0.17    | 0.63      | 0.73   | 0.69 | 0.78      | 0.85    |

Table S2. Algorithm weights used by SuperLearner to estimate  $E(Y|A, W)$ .

| <i>Outcome</i>  | Intervention                                         | GLM | GAM  | Bayes<br>GLM | GLMNET | randomForest | RPART | NNET | POLYMARS | SVM  |
|-----------------|------------------------------------------------------|-----|------|--------------|--------|--------------|-------|------|----------|------|
| <i>p,p'-DDT</i> | Water piped into home                                | 0   | 0    | 0.21         | 0.47   | 0.29         | 0     | 0    | 0.02     | 0    |
|                 | Wet mopping home $\geq 7$ times per week             | 0   | 0    | 0.48         | 0      | 0.48         | 0     | 0.03 | 0.01     | 0    |
|                 | Washing bed sheets $\geq 2$ times per month          | 0   | 0.07 | 0.08         | 0.26   | 0.21         | 0     | 0    | 0.19     | 0.18 |
|                 | Not eating a high fat diet                           | 0   | 0    | 0.48         | 0      | 0.46         | 0.03  | 0.02 | 0        | 0    |
|                 | Not consuming local animal products during pregnancy | 0   | 0    | 0.24         | 0.16   | 0.34         | 0.05  | 0.01 | 0.2      | 0    |
| <i>p,p'-DDE</i> | Water piped into home                                | 0   | 0    | 0.51         | 0      | 0.49         | 0     | 0    | 0        | 0    |
|                 | Wet mopping home $\geq 7$ times per week             | 0   | 0    | 0.44         | 0.22   | 0.16         | 0.15  | 0    | 0.04     | 0    |
|                 | Washing bed sheets $\geq 2$ times per month          | 0   | 0    | 0.51         | 0      | 0.46         | 0     | 0.03 | 0        | 0    |
|                 | Not eating a high fat diet                           | 0   | 0    | 0.48         | 0.13   | 0.24         | 0.12  | 0.04 | 0        | 0    |
|                 | Not consuming local animal products during pregnancy | 0   | 0    | 0.77         | 0      | 0.04         | 0     | 0.06 | 0.14     | 0    |

**Table S3. Algorithm weights used by SuperLearner to estimate  $E(A|W)$ .**

| <b>Intervention</b>                                           | <b>GLM</b> | <b>stepGLM</b> | <b>bayesGLM</b> | <b>GLMNET</b> | <b>randomForest</b> | <b>RPART</b> | <b>POLYMARS</b> |
|---------------------------------------------------------------|------------|----------------|-----------------|---------------|---------------------|--------------|-----------------|
| <b>Water piped into home</b>                                  | 0.4        | 0              | 0               | 0             | 0.6                 | 0            | 0               |
| <b>Wet mopping home <math>\geq 7</math> times per week</b>    | 0          | 0              | 0               | 0             | 0.09                | 0.07         | 0.85            |
| <b>Washing bed sheets <math>\geq 2</math> times per month</b> | 0.18       | 0.08           | 0               | 0             | 0                   | 0            | 0.74            |
| <b>Not eating a high fat diet</b>                             | 0          | 0              | 0.43            | 0             | 0                   | 0            | 0.57            |
| <b>Not consuming local animal products during pregnancy</b>   | 0          | 0              | 0               | 0.42          | 0                   | 0.02         | 0.56            |

**Table S4. *p,p'*-DDT and *p,p'*-DDE concentrations (ng/g-lipid) by selected characteristics in VHEMBE participants, Limpopo, South Africa.**

| Exposure Characteristic                                | n (%) <sup>a</sup> |        | <i>p,p'</i> -DDT |                    |                      | <i>p,p'</i> -DDE |                    |                      |
|--------------------------------------------------------|--------------------|--------|------------------|--------------------|----------------------|------------------|--------------------|----------------------|
|                                                        |                    |        | Median           | (IQR) <sup>b</sup> | p-value <sup>c</sup> | Median           | (IQR) <sup>b</sup> | p-value <sup>c</sup> |
| <b>Time living in home sprayed for malaria control</b> |                    |        |                  |                    | <0.01                |                  |                    | <0.01                |
| 0 years                                                | 405                | (53.9) | 32.6             | (14.1-93.5)        |                      | 152.7            | (67.1-392.0)       |                      |
| > 0 to ≤ 2 years                                       | 224                | (29.8) | 162.4            | (44.1-577.6)       |                      | 649.2            | (168.9-1827.5)     |                      |
| > 2 years                                              | 90                 | (12.0) | 233.9            | (44.0-734.2)       |                      | 722.7            | (235.9-2354.9)     |                      |
| Don't know                                             | 32                 | (4.3)  | 26.9             | (9.7-84.7)         |                      | 146.8            | (63.2-516.4)       |                      |
| <b>Maternal education</b>                              |                    |        |                  |                    | 0.18                 |                  |                    | 0.40                 |
| < 12th Grade                                           | 412                | (54.9) | 56.9             | (19.3-251.0)       |                      | 231.6            | (84.4-796.3)       |                      |
| Completed grade 12                                     | 229                | (30.5) | 70.7             | (22.1-329.6)       |                      | 312.9            | (105.3-1130.6)     |                      |
| Further studies started                                | 50                 | (6.7)  | 43.8             | (12.8-119.8)       |                      | 223.9            | (94.0-590.7)       |                      |
| Diploma or further degree                              | 60                 | (8.0)  | 41.1             | (16.8-176.4)       |                      | 206.3            | (84.3-870.5)       |                      |
| <b>Maternal age (years)</b>                            |                    |        |                  |                    | 0.59                 |                  |                    | 0.23                 |
| 18-24                                                  | 377                | (50.2) | 51.6             | (18.3-257.6)       |                      | 277.3            | (91.8-993.3)       |                      |
| 25-30                                                  | 172                | (22.9) | 75.0             | (24.4-258.1)       |                      | 281.2            | (101.8-818.2)      |                      |
| 30-35                                                  | 111                | (14.8) | 42.4             | (16.6-146.9)       |                      | 177.9            | (82.7-443.5)       |                      |
| > 35                                                   | 91                 | (12.1) | 82.6             | (19.2-382.1)       |                      | 293.8            | (87.5-817.8)       |                      |
| <b>Maternal BMI post-delivery (kg/m<sup>2</sup>)</b>   |                    |        |                  |                    | 0.76                 |                  |                    | 0.18                 |
| ≤ 24.8                                                 | 244                | (32.5) | 45.2             | (18.5-263.9)       |                      | 239.4            | (92.3-1256.0)      |                      |
| > 24.8 to ≤ 29.1                                       | 244                | (32.5) | 65.1             | (18.5-285.5)       |                      | 265.2            | (91.8-893.2)       |                      |
| > 29.1                                                 | 244                | (32.5) | 54.7             | (20.3-221.1)       |                      | 208.8            | (87.1-758.1)       |                      |
| Lost to follow-up                                      | 19                 | (2.5)  | 67.0             | (37.4-139.3)       |                      | 294.3            | (193.8-386.0)      |                      |
| <b>Poverty<sup>d</sup></b>                             |                    |        |                  |                    | 0.05                 |                  |                    | 0.45                 |
| Above food poverty line                                | 310                | (41.3) | 43.0             | (16.8-234.1)       |                      | 215.2            | (81.3-810.8)       |                      |
| Below food poverty line                                | 438                | (58.3) | 65.7             | (21.4-279.7)       |                      | 271.2            | (94.0-972.3)       |                      |
| Don't know                                             | 3                  | (0.4)  | 22.1             | (17.0-117.0)       |                      | 110.9            | (89.1-262.1)       |                      |

**Table S4 continued. *p,p'*-DDT and *p,p'*-DDE concentrations (ng/g-lipid) by selected characteristics in VHEMBE participants, Limpopo, South Africa.**

| Exposure Characteristic                         | n   | (%) <sup>a</sup> | <i>p,p'</i> -DDT |                    |                      | <i>p,p'</i> -DDE |                    |                      |
|-------------------------------------------------|-----|------------------|------------------|--------------------|----------------------|------------------|--------------------|----------------------|
|                                                 |     |                  | Median           | (IQR) <sup>b</sup> | p-value <sup>c</sup> | Median           | (IQR) <sup>b</sup> | p-value <sup>c</sup> |
| <b>Parity</b>                                   |     |                  |                  |                    | 0.91                 |                  |                    | 0.02                 |
| 0                                               | 325 | (43.3)           | 50.5             | (18.1-280.1)       |                      | 308.1            | (97.1-1280.3)      |                      |
| 1                                               | 201 | (26.8)           | 56.3             | (20.5-189.3)       |                      | 219.8            | (82.3-610.3)       |                      |
| ≥ 2                                             | 225 | (30.0)           | 58.8             | (20.2-244.6)       |                      | 197.3            | (86.2-749.2)       |                      |
| <b>Breastfeeding history (months)</b>           |     |                  |                  |                    | 0.61                 |                  |                    | 0.01                 |
| ≤ 3                                             | 337 | (44.9)           | 50.0             | (18.0-272.0)       |                      | 294.1            | (97.0-1246.8)      |                      |
| >3 to ≤ 25                                      | 203 | (27.0)           | 61.8             | (20.5-217.9)       |                      | 235.2            | (80.4-741.5)       |                      |
| > 25                                            | 211 | (28.1)           | 56.8             | (20.7-246.8)       |                      | 197.3            | (87.1-599.5)       |                      |
| <b>Distance to body of water (meters)</b>       |     |                  |                  |                    | <0.01                |                  |                    | <0.01                |
| ≤ 1400                                          | 241 | (32.1)           | 74.5             | (22.4-314.1)       |                      | 308.8            | (99.5-1248.9)      |                      |
| > 1400 to ≤ 2760                                | 240 | (32.0)           | 67.7             | (21.8-372.1)       |                      | 298.6            | (119.2-1099.6)     |                      |
| > 2760                                          | 240 | (32.0)           | 41.8             | (12.7-128.7)       |                      | 179.5            | (68.3-552.4)       |                      |
| Lost to follow-up/ GPS error                    | 30  | (4.0)            | 53.0             | (31.9-230.1)       |                      | 218.4            | (68.4-915.9)       |                      |
| <b>Pregnancy Home Building Type<sup>e</sup></b> |     |                  |                  |                    | 0.14                 |                  |                    | 0.04                 |
| Mkhuku                                          | 10  | (1.3)            | 44.1             | (24.6-111.8)       |                      | 107.0            | (72.3-259.4)       |                      |
| Rondavel                                        | 33  | (4.4)            | 163.3            | (30.4-710.3)       |                      | 490.7            | (195.4-2132.2)     |                      |
| Western Structure                               | 676 | (90.0)           | 52.7             | (18.4-257.2)       |                      | 239.7            | (92.1-856.8)       |                      |
| Other                                           | 3   | (0.4)            | 120.8            | (92.8-149.9)       |                      | 239.8            | (190.2-425.6)      |                      |
| Lost to follow-up                               | 29  | (3.9)            | 48.9             | (30.9-162.5)       |                      | 197.1            | (67.1-938.1)       |                      |
| <b>Presence of rondavel on homestead</b>        |     |                  |                  |                    | <0.01                |                  |                    | 0.01                 |
| No                                              | 577 | (76.8)           | 48.7             | (17.4-223.5)       |                      | 231.2            | (85.7-784.8)       |                      |
| Yes                                             | 145 | (19.3)           | 99.4             | (30.4-440.7)       |                      | 376.4            | (125.7-1681.4)     |                      |
| Lost to follow-up                               | 29  | (3.9)            | 48.9             | (30.9-162.5)       |                      | 197.1            | (67.1-938.1)       |                      |



**Table S4 continued. *p,p'*-DDT and *p,p'*-DDE concentrations (ng/g-lipid) by selected characteristics in VHEMBE participants, Limpopo, South Africa.**

| Exposure Characteristic                             |     |                  | <i>p,p'</i> -DDT |                    |                      | <i>p,p'</i> -DDE |                    |                      |
|-----------------------------------------------------|-----|------------------|------------------|--------------------|----------------------|------------------|--------------------|----------------------|
|                                                     | n   | (%) <sup>a</sup> | Median           | (IQR) <sup>b</sup> | p-value <sup>c</sup> | Median           | (IQR) <sup>b</sup> | p-value <sup>c</sup> |
| <b>Household owned livestock during pregnancy</b>   |     |                  |                  |                    | <0.01                |                  |                    | 0.01                 |
| No                                                  | 560 | (74.6)           | 47.2             | (17.6-221.1)       |                      | 219.6            | (80.8-759.5)       |                      |
| Yes                                                 | 190 | (25.3)           | 80.0             | (26.8-434.4)       |                      | 347.7            | (124.2-1573.1)     |                      |
| Lost to follow-up                                   | 1   | (0.1)            | 725.4            | (725.4-725.4)      |                      | 763.2            | (763.2-763.2)      |                      |
| <b>Structure density- 250 m radius (#/hectare)</b>  |     |                  |                  |                    | 0.06                 |                  |                    | 0.53                 |
| ≤ 8.1                                               | 241 | (32.1)           | 53.7             | (21.2-305.9)       |                      | 217.4            | (87.2-1234.8)      |                      |
| > 8.1 to ≤ 13.4                                     | 240 | (32.0)           | 66.5             | (20.1-267.5)       |                      | 284.0            | (96.0-760.6)       |                      |
| > 13.4                                              | 240 | (32.0)           | 49.1             | (16.0-216.3)       |                      | 243.2            | (96.1-806.1)       |                      |
| Lost to follow-up                                   | 30  | (4.0)            | 53.0             | (31.9-230.1)       |                      | 218.4            | (68.4-915.9)       |                      |
| <b>Structure density- 1000 m radius (#/hectare)</b> |     |                  |                  |                    | 0.21                 |                  |                    | 0.83                 |
| ≤ 6.5                                               | 241 | (32.1)           | 60.7             | (21.0-220.6)       |                      | 231.2            | (98.1-816.3)       |                      |
| > 6.5 to ≥ 9.4                                      | 240 | (32.0)           | 52.7             | (16.5-308.2)       |                      | 190.3            | (76.3-889.6)       |                      |
| > 9.4                                               | 240 | (32.0)           | 56.2             | (19.1-244.8)       |                      | 283.7            | (111.4-896.9)      |                      |
| Lost to follow-up                                   | 30  | (4.0)            | 53.0             | (31.9-230.1)       |                      | 218.4            | (68.4-915.9)       |                      |

<sup>a</sup> Percentages may not add to 100% due to rounding.

<sup>b</sup> IQR = inter-quartile range, NC = not calculated

<sup>c</sup> p-values from Kruskal-Wallis tests for all determinants except for maternal age and BMI, distance to river and lake/reservoir, structure density, and fat consumption (p-values from Spearman's correlation test)

<sup>d</sup> Food poverty line developed by Statistics South Africa (370 Rands or \$25 monthly income per household member)

<sup>e</sup> The pregnancy home is the building the mother lived and slept during her pregnancy. Mhkuku are buildings typically made out of corrugated iron, rondavels are earth/thatch structures, and western buildings are typically concrete walls with corrugated/tile iron roofs

**Table S5. Comparison of VHEMBE lipid-adjusted serum concentrations with previously reported blood concentrations in adults living in IRS communities and pregnant women living in the United States**

| Study <sup>a</sup> | Collected <sup>b</sup> | Exposure classification                    | N                | <i>p,p'</i> -DDT (ng/g-lipid) |                    |                       | <i>p,p'</i> -DDE (ng/g-lipid) |          |                       |
|--------------------|------------------------|--------------------------------------------|------------------|-------------------------------|--------------------|-----------------------|-------------------------------|----------|-----------------------|
|                    |                        |                                            |                  | 25 <sup>th</sup> %ile         | Median             | 75 <sup>th</sup> %ile | 25 <sup>th</sup> %ile         | Median   | 75 <sup>th</sup> %ile |
| VHEMBE             | 2012-2013              | Home sprayed with DDT during pregnancy     | 23               | 161.8                         | 736.9              | 1726.7                | 840.4                         | 2129.0   | 3238.1                |
| VHEMBE             | 2012-2013              | Home not sprayed with DDT during pregnancy | 720              | 18.6                          | 50.0               | 236.9                 | 87.2                          | 230.9    | 803.3                 |
| VHEMBE             | 2012-2013              | Home ever sprayed with DDT                 | 254              | 55.5                          | 225.5              | 733.4                 | 238.3                         | 803.6    | 2189.2                |
| VHEMBE             | 2012-2013              | Home never sprayed with DDT                | 478              | 14.8                          | 33.5               | 106.5                 | 68.7                          | 155.8    | 439.4                 |
| VHEMBE             | 2012-2013              | All                                        | 751              | 19.0                          | 55.3               | 259.3                 | 91.8                          | 242.2    | 878.7                 |
| SOWB               | 2010-2011              | Home probably sprayed with DDT             | 100              | 296.1                         | 750.5              | 1565.6                | 566.7                         | 2411.4   | 4396.1                |
| SOWB               | 2010-2011              | Home probably sprayed with pyrethroids     | 106              | 155.6                         | 395.1              | 737.8                 | 973.9                         | 2164.9   | 3633.3                |
| SOWB               | 2010-2011              | Unsprayed village                          | 175              | 30.7                          | 84.1               | 243.0                 | 187.2                         | 493.0    | 1688.5                |
| NSA-BRC            | 2008                   | High-risk malaria area                     | 91               | 1279.0                        | 2788.0             | 4525.0                | 1986.0                        | 4092.0   | 7341.0                |
| NSA-BRC            | 2008                   | Low-risk malaria area                      | 47               | 7.0                           | 27.0               | 165.0                 | 54.0                          | 184.0    | 908.0                 |
| NSA-BRC            | 2008                   | Non-malaria area                           | 117              | 6.0                           | 7.0                | 8.0                   | 18.0                          | 26.0     | 49.0                  |
| THES               | 2008                   | Home sprayed with DDT 2 months prior       | 19               | NA <sup>c</sup>               | NA <sup>c</sup>    | NA <sup>c</sup>       | 1200.0                        | 4700.0   | 23000.0               |
| LMSQ <sup>e</sup>  | 2003-2005              | Home sprayed with DDT within year          | 249              | 41149.5                       | 71200.2            | 126495.7              | 103878.0                      | 180655.1 | 298455.6              |
| LMSQ <sup>e</sup>  | 2003-2005              | Home not sprayed                           | 48               | 6100.8                        | 14261.2            | 34700.2               | 32252.5                       | 62871.0  | 122518.0              |
| NHANES             | 1999-2004              | Non-IRS population                         | 277 <sup>d</sup> | < 5.1 <sup>f</sup>            | < 5.1 <sup>f</sup> | 8.0                   | 78.2                          | 131.0    | 291.0                 |
| CHAMACOS           | 1999-2000              | Non-IRS population                         | 426              | 6.9                           | 12.5               | 35.6                  | 568.0                         | 1052.0   | 2668.0                |
| CHDS               | 1959-1967              | Non-IRS population                         | 283              | 1000.0                        | 1400.0             | 1900.0                | 3800.0                        | 5200.0   | 6900.0                |
| CPP                | 1959-1966              | Non-IRS population                         | 1393             | 780.0                         | 1100.0             | 1730.0                | 2090.0                        | 3000.0   | 4490.0                |

<sup>a</sup> Study key: VHEMBE = this study, SOWB = Study of Women and Babies ([Whitworth et al. 2014](#)), NSA-BRC = Norway-South Africa Bilateral Research Collaborative ([Channa et al. 2012](#)), THES = Total Homestead Environment Study ([Van Dyk et al. 2010](#)), LMSQ = Limpopo men's serum quality study ([Aneck-Hahn et al. 2007](#)), NHANES = National Health and Nutrition Examination Survey ([Center for Disease Control 2000, 2002, 2004](#)), CHAMACOS = Center for the Health Assessment of Mother and Children of Salinas study ([Bradman et al. 2007](#)), CHDS = Child Health and Development Study ([Bhatia et al. 2004](#)), CPP = Collaborative Perinatal Project ([Jusko et al. 2012](#))

<sup>b</sup> Year(s) blood collected.

<sup>c</sup> NA = not available. Majority of samples below limit of detection (LOD) and lipid-adjusted LOD not presented.

<sup>d</sup> Number of *p,p'*-DDT measurements = 263.

<sup>e</sup> Distributions estimated from the reported mean and standard deviation (see text).

<sup>f</sup> LOD for *p,p'*-DDT was approximately 5.1 ng/g-lipid across the three sampling periods (1999-2000, 2001-2002, and 2003-2004).

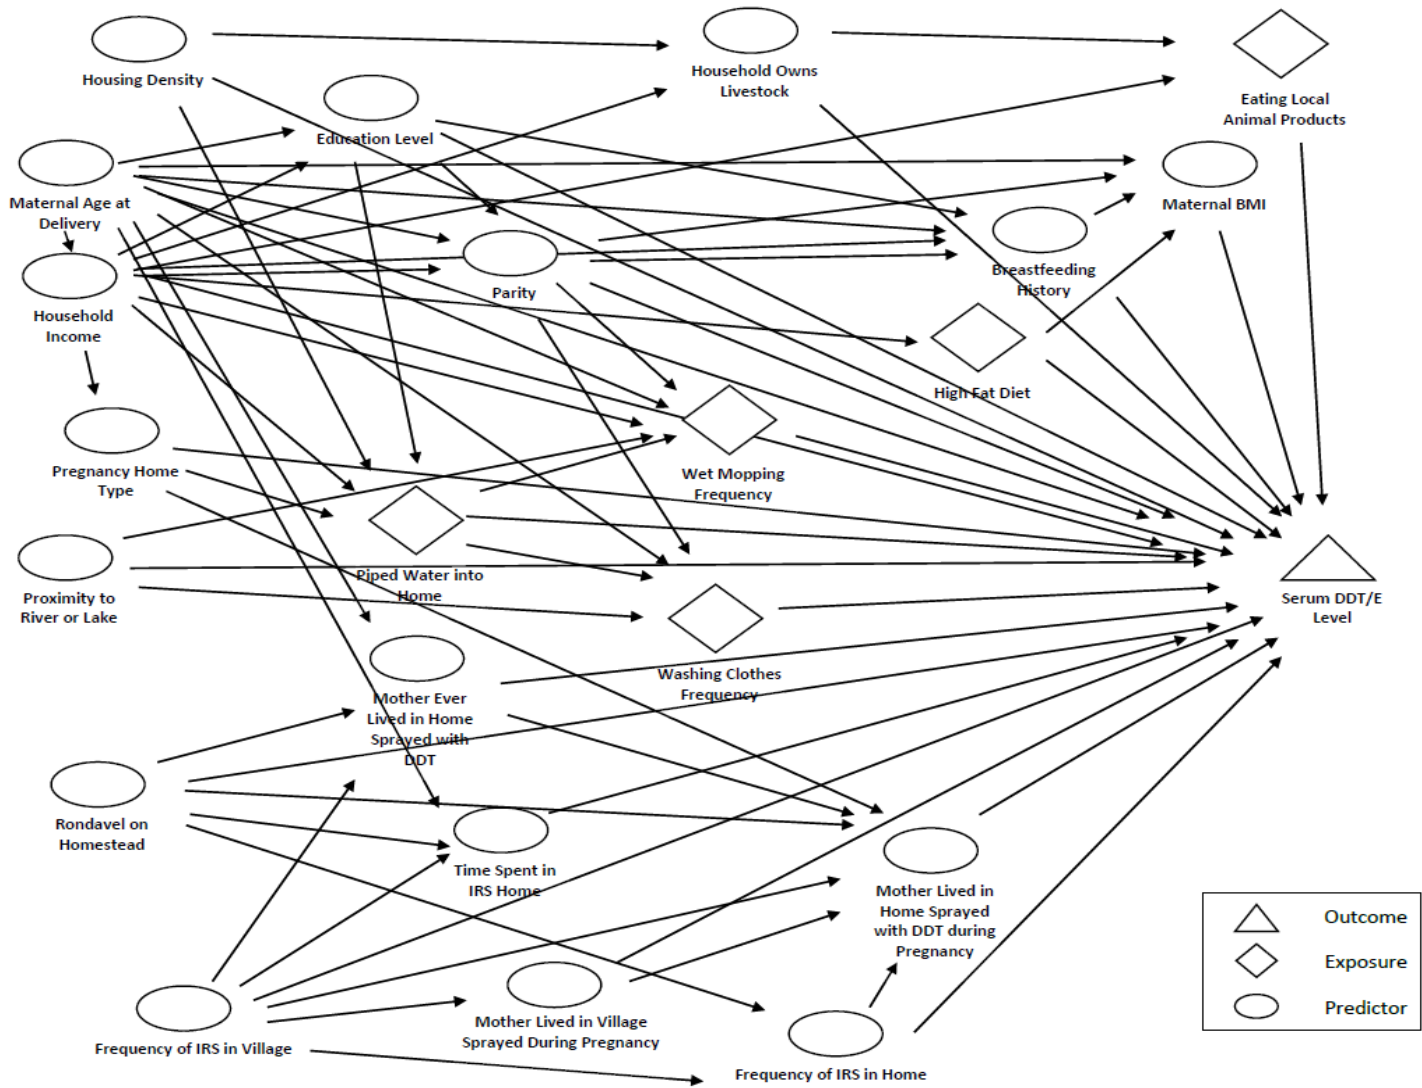

Figure S1. Directed Acyclical Graph (DAG) used to conceptualize the relationship between exposures and outcomes.

*p,p'*-DDE by Quintile

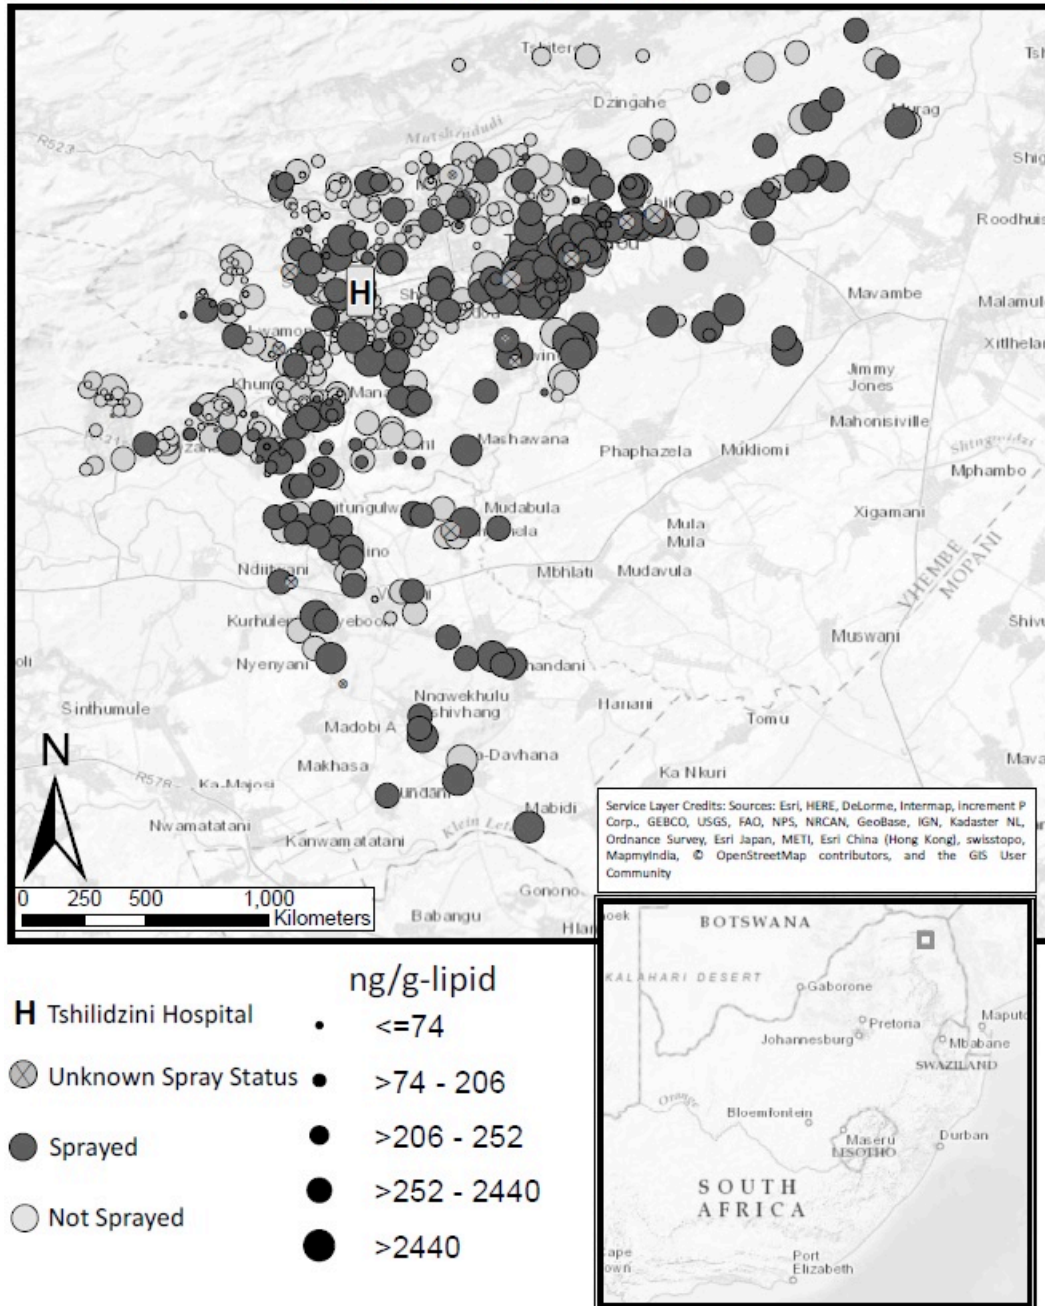

Figure S2. Spatial distribution of *p,p'*-DDE concentrations in relation to Tshildzini Hospital

#### 4. References

- Aneck-Hahn NH, Schulenburg GW, Bornman MS, Farias P, de Jager C. 2007. Impaired Semen Quality Associated with Environmental DDT Exposure in Young Men Living in a Malaria Area in the Limpopo Province, South Africa. *Journal of Andrology* 28:423-434.
- Bhatia R, Shiau R, Petreas M, Weintraub JM, Farhang L, Eskenazi B. 2004. Organochlorine Pesticides and Male Genital Anomalies in the Child Health and Development Studies. *Environmental Health Perspectives* 113:220-224.
- Bradman AS, Schwartz JM, Fenster L, Barr DB, Holland NT, Eskenazi B. 2007. Factors predicting organochlorine pesticide levels in pregnant Latina women living in a United States agricultural area. *J Expo Sci Environ Epidemiol* 17:388-399.
- Center for Disease Control. 2000. 1999–2000 National Health and Nutrition Examination Survey (NHANES), Demographics and Dioxins Data Files.  
[http://wwwn.cdc.gov/nchs/nhanes/search/nhanes99\\_00.aspx](http://wwwn.cdc.gov/nchs/nhanes/search/nhanes99_00.aspx).
- Center for Disease Control. 2002. 2001–2002 National Health and Nutrition Examination Survey (NHANES), Demographics and Dioxins Data Files.  
[http://wwwn.cdc.gov/nchs/nhanes/search/nhanes01\\_02.aspx](http://wwwn.cdc.gov/nchs/nhanes/search/nhanes01_02.aspx).
- Center for Disease Control. 2004. 2003–2004 National Health and Nutrition Examination Survey (NHANES), Demographics and Dioxins Data Files.  
[http://wwwn.cdc.gov/nchs/nhanes/search/nhanes03\\_04.aspx](http://wwwn.cdc.gov/nchs/nhanes/search/nhanes03_04.aspx).
- Channa K, Röllin HB, Nøst TH, Odland JØ, Sandanger TM. 2012. Prenatal Exposure to DDT in Malaria Endemic Region Following Indoor Residual Spraying and in Non-Malaria Coastal Regions of South Africa. *Science of the Total Environment* 429:183-190.
- Jusko TA, Klebanoff MA, Brock JW, Longnecker MP. 2012. In-Utero Exposure to Dichlorodiphenyltrichloroethane and Cognitive Development among Infants and School-Aged Children. *Epidemiology* 23:689-698.
- Textor J, Hardt J, Knüppel S. 2011. DAGitty: A Graphical Tool for Analyzing Causal Diagrams. *Epidemiology* 22:745.
- Van Dyk JC, Bouwman H, Barnhoorn IEJ, Bornman MS. 2010. DDT Contamination from Indoor Residual Spraying for Malaria Control. *The Science of the Total Environment* 408:2745-2752.
- Whitworth KW, Bornman R, Archer JI, Kudumu MO, Travlos GS, Wilson RE, et al. 2014. Predictors of Plasma DDT and DDE Concentrations among Women Exposed to Indoor Residual Spraying for Malaria Control in the South African Study of Women and Babies (SOWB). *Environ Health Perspect* 122:545-552.
